# Supplementary material
Source: publisher figshare collection journal article supplement (https://brill.figshare.com/articles/dataset/_/26056720)
Supplement: Supplementary file 1 [file 1]

# **Personality Functioning, Narcissism and Borderline Traits in the General Population Predict Deviations from the Optimal Time Perspective**

**Olivier Dussault<sup>1,\*</sup>, Simon Grondin<sup>2</sup> and Olivier Laverdière<sup>1</sup>**

<sup>1</sup>Département de psychologie, Université de Sherbrooke, Sherbrooke, QC J1K 2R1, Canada

<sup>2</sup>École de psychologie, Université Laval, Québec, QC G1V 0A6, Canada

\*Corresponding author; e-mail: [olivier.dussault@usherbrooke.ca](mailto:olivier.dussault@usherbrooke.ca)

**Supplementary material**

## **Table S1.**

Full correlation matrix of pathological and normal personality indicator, borderline personality traits, narcissistic personality traits and time perspective.
