# Supplementary material
Source: publisher figshare collection journal article supplement (https://brill.figshare.com/articles/dataset/_/26056720)
Supplement: Supplementary file 1 [file 1]

## Sheet: Table S1
	Table S1.
	Full correlation matrix of pathological and normal personality indicator, borderline personality traits, narcissistic personality traits and time perspective.
		Inventory of personality organisation	Efficacity	Boredom	Rejection sensitivity	Impulsivity	Dependency	Admiration	Rivalry	Hypersensitive narcissism	Self-criticism	Past Positive	Past Negative	Present Hedonistic	Present Fatalistic	Future	DBTP-R
	INVENTORY OF PERSONALITY ORGANISATION	1
	EFFICACITY	-0.108	1
	BOREDOM	0.586**	-0.204**	1
	REJECTION SENSITIVITY	0.404**	-0.118	0.383**	1
	IMPULSIVITY	0.531**	-0.224**	0.431**	0.327**	1
	DEPEDENCY	0.191**	-0.289**	0.158**	0.119	-0.023	1
	ADMIRATION	0.071	0.118	-0.026	-0.172*	0.083	0.020	1
	RIVALRY	0.193*	0.052	0.084	-0.055	0.259**	0.085	0.548**	1
	HYPERSENSITIVE NARCISSISM	0.532**	-0.202	0.440**	0.346**	0.222**	0.144	0.032	0.220**	1
	SELF-CRITICISM	0.559**	0.081	0.506**	0.359**	0.211**	0.344**	0.050	0.143	0.525**	1
	PAST-POSITIVE	-0.258**	0.016	-0.291**	-0.313**	-0.132	0.058	0.149*	0.078	-0.238**	-0.336**	1
	PAST-POSITIVE	0.615**	-0.044	0.598**	0.364**	0.379**	0.315**	-0.048	0.056	0.480**	0.555*	-0.354**	1
	Present Hedonistic	0.314**	-0.046	0.110	0.054	0.474**	0.067	0.132	0.072	-0.076	0.020	0.117	0.161*	1
	Present Fatalistic	0.430**	-0.205**	0.444**	0.188*	0.353**	0.027	-0.043	0.080	0.290**	0.171*	0.054	0.317**	0.389**	1
	Future	-0.285**	0.259**	-0.275**	-0.132	-0.485**	0.018	0.086	0.030	-0.003	0.030	-0.024	-0.099	-0.501**	-0.350**	1
	DBTP-R	0.652**	-0.136	0.649**	0.429**	0.483**	0.169*	-0.137	0.015	0.471**	0.508**	-0.582**	0.828**	0.256**	0.517**	-0.426**	1
	Mean ± SD	2.14 ± 0.51	-0.50 ± 1.27	9.27 ± 4.80	8.80 ± 3.76	2.01 ± 0.34	-0.52 ± 0.85	22.76 ± 6.70	18.38 ± 5.35	3.80 ± 0.87	-0.04 ± 0.91	3.52 ± 0.72	3.01 ± 0.89	3.30 ± 0.62	2.29 ± 0.64	3.66 ± 0.63	3.37 ± 0.92
	Note. * p < 0.05 two-tailed, ** p < 0.01 two-tailed.
	INVENTORY OF PERSONALITY ORGANISATION	EFFICACITY	BOREDOM	REJECTION SENSITIVITY	IMPULSIVITY	DEPEDENCY	ADMIRATION	RIVALRY	HYPERSENSITIVE NARCISSISM	SELF-CRITICISM
